## Electrocommunication signals in free swimming brown ghost knifefish, *Apteronotus leptorhynchus*

Ginette J. Hupé and John E. Lewis

10.1242/jeb.039081

There was an error published in *J. Exp. Biol.* **211**, 1657-1667.

In Fig. 9B (top panel), an incorrect graph was published. Instead of the correct data, the data from Fig. 9A was inadvertently duplicated in Fig. 9B. The correct version of Fig. 9 is published below.

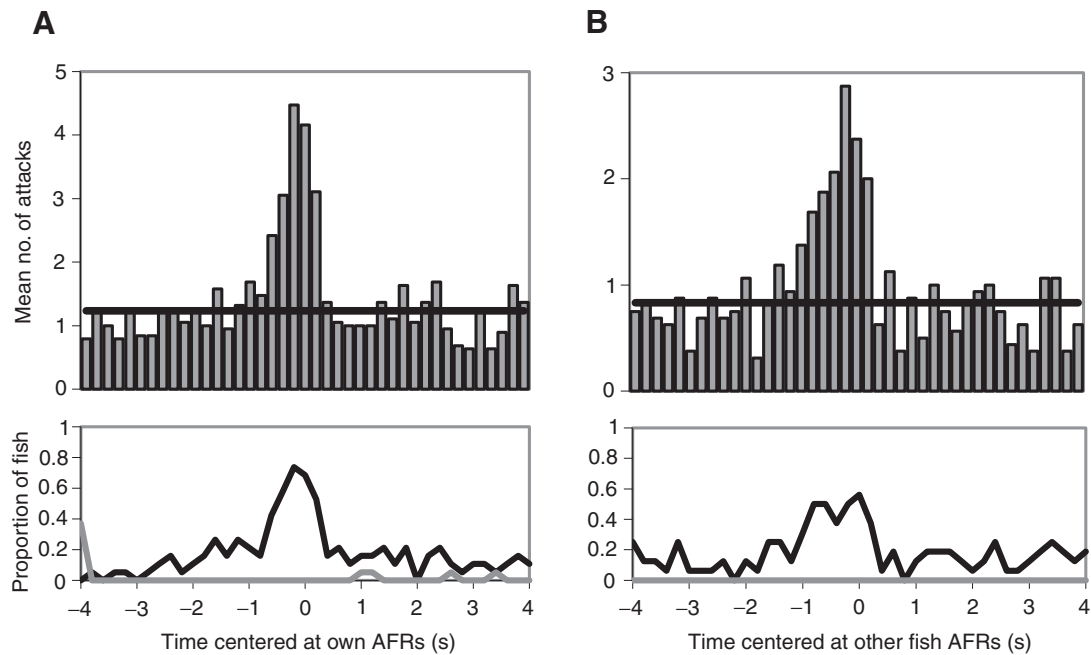

The authors apologise for any inconvenience caused and would like to reassure readers that this error does not influence any of the results or conclusions of the paper.
